# Supplementary material
Source: PubMed Central journal article supplement (PMC3707675)
Supplement: supp_M113.457556_jbc.M113.457556-1.pdf [file supp_M113.457556_jbc.M113.457556-1.pdf]

| <b>Correlation settings</b>                                                                                                                                                                                                                             |                                                                  |
|---------------------------------------------------------------------------------------------------------------------------------------------------------------------------------------------------------------------------------------------------------|------------------------------------------------------------------|
| Insertion of new peptides<br><ul style="list-style-type: none"> <li>do not insert new peptides</li> <li>insert peptides only in range</li> </ul>                                                                                                        | checked<br>unchecked                                             |
| LC peak detection<br><ul style="list-style-type: none"> <li>left LC window (secs)</li> <li>right LC window (secs)</li> </ul>                                                                                                                            | 30<br>30                                                         |
| „use fixed“                                                                                                                                                                                                                                             | Wild type                                                        |
| <b>Options</b>                                                                                                                                                                                                                                          |                                                                  |
| Include in preselected peptides (PSPs)<br><ul style="list-style-type: none"> <li>bold red</li> <li>light red,</li> <li>bold black</li> <li>parenthesized</li> <li>peptide filter</li> </ul>                                                             | checked<br>checked<br>checked<br>checked<br>Mascot score 1 -200  |
| Recalibration of preselected peptides<br><ul style="list-style-type: none"> <li>domain</li> <li>peptide filter</li> </ul>                                                                                                                               | Frequency, 1/ <sup>0.5</sup> (OrbiTrap)<br>Mascot score 30 - 200 |
| Validation of preselected peptides<br><ul style="list-style-type: none"> <li>peptide filter</li> </ul>                                                                                                                                                  | Mascot score 15 - 200                                            |
| Classification of preselected peptides (PSPs) by Mascot score<br><ul style="list-style-type: none"> <li>category A</li> <li>category B</li> <li>category C</li> <li>protein is validated by default if ABC score is greater than or equal to</li> </ul> | 15<br>15<br>15<br>30                                             |
| Quantitation mode                                                                                                                                                                                                                                       | v2.2 ICAT 9C                                                     |
| MGF file generator                                                                                                                                                                                                                                      | NewDTASupercharge, up to 1.18....                                |
| Raw file type                                                                                                                                                                                                                                           | LTQ-FT/LTQ OrbiTrap (.raw)                                       |
| Type(s) for quantitation                                                                                                                                                                                                                                | all MS spectra                                                   |

**SUPPLEMENTAL TABLE 1.** MSQuant parameters used for quantification of LC-MS/MS data
